# Supplementary material for: A Systematically Reduced Mathematical Model for Organoid Expansion
Source: PubMed Central journal article supplement (PMC8222789; doi:10.3389/fbioe.2021.670186), 2021-06-10
Supplement: Data_Sheet_1.pdf [file Data_Sheet_1.pdf]

## Supplementary Material

### 1 DERIVATION OF ANALYTIC SOLUTION TO THE SUBLIMIT APPROXIMATION

We consider the sublimit approximation discussed in Section 2.3.2,

$$\alpha \frac{\partial C}{\partial T} + \beta \frac{\partial C}{\partial X} = -\gamma C \exp(PT), \quad (1.1)$$

$$\alpha \frac{\partial W}{\partial T} + \beta \frac{\partial W}{\partial X} = 2\gamma C \exp(PT), \quad (1.2)$$

with boundary and initial conditions

$$C = 1, \quad W = 0 \quad \text{at } X = 0, \quad (1.3)$$

$$C = \frac{1}{\alpha}, \quad W = 0 \quad \text{at } T = 0. \quad (1.4)$$

We can make progress analytically via the method of characteristics.

#### 1.1 Solution for glucose concentration

We begin by considering the glucose concentration, since Eq. (1.1) is decoupled from Eq. (1.2), and introduce our coordinates in characteristic space,  $(S, \tau)$ , where we define

$$S = \alpha X - \beta T, \quad (1.5)$$

where  $S$  is a constant along each characteristic curve and  $\tau$  parameterises the characteristics. Each characteristic curve for Eq. (1.1) will satisfy:

$$\frac{dT}{d\tau} = \alpha, \quad (1.6)$$

$$\frac{dX}{d\tau} = \beta, \quad (1.7)$$

$$\frac{dC}{d\tau} = -\gamma C e^{PT}, \quad (1.8)$$

with our initial data,  $\Gamma(S) = (T(S), X(S), C(S))$  at  $\tau = 0$ ,

$$\Gamma(S) = \begin{cases} \left(0, \frac{S}{\alpha}, \frac{1}{\alpha}\right) & \text{for } S > 0, \\ \left(-\frac{S}{\beta}, 0, 1\right) & \text{for } S < 0. \end{cases} \quad (1.9)$$

$$(1.10)$$

Solving Eqs. (1.6) and (1.7) subject to the initial data gives the coordinate transformations,

$$\text{For } S > 0 : \begin{cases} T = \alpha\tau, \\ X = \beta\tau + \frac{S}{\alpha}, \end{cases} \quad \text{and for } S < 0 : \begin{cases} T = \alpha\tau - \frac{S}{\beta}, \\ X = \beta\tau \end{cases}. \quad (1.11)$$

**Region 1,  $S > 0$  :**

The equation for  $C$ , Eq. (1.8), becomes

$$\frac{dC}{d\tau} = -\gamma C e^{P\alpha\tau}, \quad (1.12)$$

which we integrate to obtain

$$C = D(S) \exp\left(-\frac{\gamma}{P\alpha} e^{P\alpha\tau}\right), \quad (1.13)$$

where  $D(S)$  is an arbitrary function of  $S$  to be determined from the initial condition,  $C(S, \tau = 0) = 1/\alpha$ . We obtain

$$C(S, \tau) = \frac{1}{\alpha} \exp\left(\frac{\gamma}{P\alpha}\right) \exp\left(-\frac{\gamma}{P\alpha} e^{P\alpha\tau}\right) \quad \text{for } S > 0, \quad (1.14)$$

which we can rewrite in Cartesian coordinates as:

$$C(X, T) = \frac{1}{\alpha} \exp\left(\frac{\gamma}{\alpha P} (1 - e^{PT})\right), \quad \text{which holds for } \alpha X - \beta T > 0. \quad (1.15)$$

**Region 2,  $S < 0$  :**

The equation for  $C$ , Eq. (1.8), becomes

$$\frac{dC}{d\tau} = -\gamma C e^{P\left(\alpha\tau - \frac{S}{\beta}\right)}, \quad (1.16)$$

which we integrate to obtain

$$C = E(S) \exp\left(-\frac{\gamma}{P\alpha} e^{P\left(\alpha\tau - \frac{S}{\beta}\right)}\right), \quad (1.17)$$

where  $E(S)$  is an arbitrary function of  $S$  to be determined from the boundary condition,  $C(S, \tau = 0) = 1$ . We obtain

$$C(S, \tau) = \exp\left(\frac{\gamma}{P\alpha} e^{-P\frac{S}{\beta}}\right) \exp\left(-\frac{\gamma}{P\alpha} e^{P\left(\alpha\tau - \frac{S}{\beta}\right)}\right) \quad \text{for } S < 0, \quad (1.18)$$

which we can rewrite in Cartesian coordinates as:

$$C(X, T) = \exp\left(\frac{\gamma}{\alpha P} \left(e^{-P\left(\frac{\alpha}{\beta}X - T\right)} - e^{PT}\right)\right), \quad \text{which holds for } \alpha X - \beta T < 0. \quad (1.19)$$

**1.2 Solution for lactate concentration**

In a similar manner, we can use the method of characteristics to make analytic progress for the lactate concentration,  $W$ . We introduce our characteristic coordinates  $S$  and  $\tau$  again, and the governing equation, Eq. (1.2), satisfies:

$$\frac{dT}{d\tau} = \alpha, \quad \frac{dX}{d\tau} = \beta, \quad \frac{dW}{d\tau} = 2\gamma C e^{PT}, \quad (1.20)$$

with initial data,  $\tilde{\Gamma}(S) = (T(S), X(S), W(S))$  at  $\tau = 0$ :

$$\tilde{\Gamma}(S) = \begin{cases} \left(0, \frac{S}{\alpha}, 0\right) & \text{for } S > 0, \\ \left(-\frac{S}{\beta}, 0, 0\right) & \text{for } S < 0. \end{cases} \quad (1.21)$$

$$\tilde{\Gamma}(S) = \begin{cases} \left(-\frac{S}{\beta}, 0, 0\right) & \text{for } S < 0. \end{cases} \quad (1.22)$$

We have the same coordinate transformation for Regions 1 and 2 as for  $C$ , Eq. (1.11). Hence, we can write the governing equation for  $W$  as an explicit integral of known functions:

$$W(S, \tau) = \int_0^\tau 2\gamma C(T(S, \tau), X(S, \tau)) e^{PT(S, \tau)} d\tau, \text{ subject to } W = 0 \text{ at } \tau = 0, \quad (1.23)$$

where  $S$  is treated as a constant and  $C$  is defined in Eqs. (1.14) and (1.18).

### Region 1, $S > 0$ :

For Region 1 ( $S > 0$ ), Eq. (1.20) becomes,

$$\frac{dW}{d\tau} = 2\gamma \frac{1}{\alpha} \exp\left(\frac{\gamma}{P\alpha}\right) \exp\left(-\frac{\gamma}{P\alpha} e^{P\alpha\tau}\right) e^{P\alpha\tau}, \quad (1.24)$$

We integrate to solve this explicitly, to find

$$W = -\frac{2}{\alpha} e^{\frac{\gamma}{P\alpha}} \exp\left(-\frac{\gamma}{P\alpha} e^{P\alpha\tau}\right) + F(S), \quad (1.25)$$

where the arbitrary function  $F(S)$  is determined by the boundary condition  $W = 0$  at  $\tau = 0$  to give

$$W(S, \tau) = \frac{2}{\alpha} \left(1 - e^{\frac{\gamma}{P\alpha}} \exp\left(-\frac{\gamma}{P\alpha} e^{P\alpha\tau}\right)\right), \quad (1.26)$$

which we can rewrite in Cartesian coordinates as:

$$W(X, T) = \frac{2}{\alpha} \left(1 - \exp\left(\frac{\gamma}{P\alpha} \left(1 - e^{PT}\right)\right)\right). \quad (1.27)$$

### Region 2, $S < 0$ :

For Region 2 ( $S < 0$ ), Eq. (1.20) becomes,

$$\frac{dW}{d\tau} = 2\gamma \exp\left(\frac{\gamma}{P\alpha} e^{-P\frac{S}{\beta}}\right) \exp\left(-\frac{\gamma}{P\alpha} e^{P\left(\alpha\tau - \frac{S}{\beta}\right)}\right) e^{P\left(\alpha\tau - \frac{S}{\beta}\right)}. \quad (1.28)$$

Similarly, we integrate this to find

$$W = -2 \exp\left(\frac{\gamma}{P\alpha} e^{-\frac{PS}{\beta}}\right) \exp\left(-\frac{\gamma}{P\alpha} e^{P\left(\alpha\tau - \frac{S}{\beta}\right)}\right) + G(S), \quad (1.29)$$

where the arbitrary function  $G(S)$  is determined by the boundary condition  $W = 0$  at  $\tau = 0$  to give:

$$W(S, \tau) = 2 \left( 1 - \exp \left( \frac{\gamma}{P\alpha} \left( e^{-P\frac{S}{\beta}} - e^{P\left(\alpha\tau - \frac{S}{\beta}\right)} \right) \right) \right), \quad (1.30)$$

which we can rewrite in Cartesian coordinates as:

$$W(X, T) = 2 \left( 1 - \exp \left( \frac{\gamma}{P\alpha} \left( e^{-P\left(\frac{\alpha}{\beta}X - T\right)} - e^{PT} \right) \right) \right). \quad (1.31)$$
